# Supplementary material for: Detection of Avian Influenza Virus in Surface Waters Using Passive Samplers
Source: Research Square preprint supplement (doi:10.21203/rs.3.rs-6768892/v1), 2025-06-05

**Detection of Avian Influenza Virus in Surface Waters Using Passive Samplers**

Madison T. Gouthro1, Emalie K. Hayes1, Taylor Prest1, and Graham A. Gagnon1

1Centre for Water Resources Studies, Department of Civil & Resource Engineering, Dalhousie University, 1360 Barrington Street, Halifax, Nova Scotia B3H 4R2, Canada

*Table S1*. Minimum and maximum gene copies per sampler across all sites and gene targets. Sites without PMMoV concentrations listed were measured but not detected.

| **Site** | **Target** | **Min GC** | **Max GC** |
| --- | --- | --- | --- |
| 1 | H5 | 1.88 × 104 | 3.10 × 108 |
| 1 | Pan-FluA | 2.74 × 104 | 9.06 × 108 |
| 2 | H5 | 3.14 × 107 | 3.14 × 107 |
| 2 | Pan-FluA | 5.11 × 104 | 2.13 × 105 |
| 3 | H5 | 2.18 × 108 | 1.47 × 1010 |
| 3 | Pan-FluA | 5.08 × 104 | 5.61 × 1012 |
| 3 | PMMoV | 4.89 × 103 | 4.89 × 103 |
| 4A | H5 | 3.60 × 107 | 3.60 × 107 |
| 4A | Pan-FluA | 1.80 × 105 | 6.72 × 108 |
| 4B | H5 | 2.17 × 104 | 5.80 × 109 |
| 4B | Pan-FluA | 5.97 × 104 | 3.60 × 1012 |
| 4B | PMMoV | 2.59 × 103 | 1.74 × 105 |
| 4C | H5 | 1.19 × 107 | 1.19 × 107 |
| 4C | Pan-FluA | 1.73 × 104 | 1.90 × 108 |
| 5 | H5 | 3.94 × 104 | 1.77 × 1011 |
| 5 | Pan-FluA | 1.03 × 105 | 3.31 × 1012 |

*Table S2*. Median values and standard deviations for select water chemistry parameters were measured between May and October 2024 at Sites 4A, 4B, and 4C.

| **Site 4A** | **Parameter** | **Median** | **Standard Deviation** | **Units** |
| --- | --- | --- | --- | --- |
| Temperature | 17.9 | 4.9 | °C |
| Dissolved Oxygen | 8.9 | 0.7 | mg L-1 |
| Conductivity | 113.8 | 28.7 | μs cm-1 |
| Total Dissolved Solids | 82.1 | 24.9 | mg L-1 |
| pH | 6.7 | 0.08 | - |
| Turbidity | 1.0 | 1.2 | NTU |
| UV 254 | 0.2 | 0.09 | cm-1 |
| Color | 35.0 | 16.7 | Pt-Co |
| Alkalinity | 14.5 | 3.1 | mg L-1 |
| Total Coliforms | 1433.8 | 797.3 | CFU 100 mL-1 |
| *E. coli* | 60.2 | 85.7 | CFU 100 mL-1 |
| Dissolved Organic Carbon | 4.6 | 1.5 | mg L-1 |
| Dissolved Nitrogen | 0.3 | 0.6 | mg L-1 |
| Total Organic Carbon | 4.8 | 1.6 | mg L-1 |
| Total Nitrogen | 0.3 | 0.05 | mg L-1 |
| Ducks | 0 | 0 | Count |
| **Site 4B** | Temperature | 17.2 | 3.2 | °C |
| Dissolved Oxygen | 6.8 | 1.5 | mg L-1 |
| Conductivity | 300.1 | 184.6 | μs cm-1 |
| Total Dissolved Solids | 219.7 | 135.3 | mg L-1 |
| pH | 6.9 | 0.4 | - |
| Turbidity | 5.5 | 6.3 | NTU |
| UV 254 | 0.2 | 0.07 | cm-1 |
| Color | 51.0 | 16.5 | Pt-Co |
| Alkalinity | 72.9 | 55.4 | mg L-1 |
| Total Coliforms | 6884.5 | 4540.4 | CFU 100 mL-1 |
| *E. coli* | 173.3 | 616.3 | CFU 100 mL-1 |
| Dissolved Organic Carbon | 7.4 | 2.3 | mg L-1 |
| Dissolved Nitrogen | 5.4 | 5.1 | mg L-1 |
| Total Organic Carbon | 7.2 | 3.3 | mg L-1 |
| Total Nitrogen | 5.5 | 5.2 | mg L-1 |
| Ducks | 0 | 0 | Count |
| **Site 4C** | Temperature | 16.8 | 4.1 | °C |
| Dissolved Oxygen | 9.1 | 0.9 | mg L-1 |
| Conductivity | 120.6 | 27.9 | μs cm-1 |
| Total Dissolved Solids | 92.6 | 21.4 | mg L-1 |
| pH | 6.7 | 0.09 | - |
| Turbidity | 1.8 | 20.7 | NTU |
| UV 254 | 0.2 | 0.01 | cm-1 |
| Color | 28.0 | 17.8 | Pt-Co |
| Alkalinity | 16.9 | 4.5 | mg L-1 |
| Total Coliforms | 773.4 | 427.4 | CFU 100 mL-1 |
| *E. coli* | 83.3 | 700.8 | CFU 100 mL-1 |
| Dissolved Organic Carbon | 4.5 | 1.7 | mg L-1 |
| Dissolved Nitrogen | 0.2 | 0.08 | mg L-1 |
| Total Organic Carbon | 4.4 | 1.7 | mg L-1 |
| Total Nitrogen | 0.2 | 0.08 | mg L-1 |
| Ducks | 0 | 0 | Count |

*Table S3.* Monthly mean surface water temperatures (°C ± standard deviations) recorded from May to October at Sites 1, 2, 3,4, and 5.

| Site | May | June | July | August | September | October |
| --- | --- | --- | --- | --- | --- | --- |
| 1 | 15.2 + 1.88 | 19.3 + 1.30 | 23.2 + 1.59 | 23.8 + 0.67 | 20.0 + 1.30 | 15.8 + 1.20 |
| 2 | 15.9 +2.34 | 19.8 +1.52 | 24.7 +0.88 | 24.4 +0.40 | 20.4 +0.98 | 16.2 +1.43 |
| 3 | 14.1 +1.79 | 17.3 +1.23 | 22.6 +0.99 | 22.4 +0.99 | 17.9 +1.31 | 14.9 +1.49 |
| 4 | 15.0 +2.18 | 16.1 +4.86 | 19.4 +1.81 | 21.6 +1.57 | 16.6 +1.41 | 13.2 +3.29 |
| 5 | 14.0 +2.42 | 18.2 +1.35 | 23.3 +1.09 | 23.3 +0.50 | 19.4 + 1.25 | 16.2 +1.48 |

*Table S4*. Integrated DNA Technologies (IDT) gBlock® gene fragments and Twist Bioscience RNA standards.

| **Assay Name** | **Manufact.** | **NCBI** | **Length (bp)** | **Concentration** | **Control Type** | **Storage** |
| --- | --- | --- | --- | --- | --- | --- |
| H5N1 (M1 Gene) | IDT | NC_007363.1 | 759 | 1.28×1012 copies/uL | cDNA | -20oC |
| H5N1 (HA Gene) | IDT | AF144305.1 | 1760 | 1.28×1012copies/uL | cDNA | -20oC |
| H5N1 (HA & NA Genes) | Twist Bioscience (109012) | OR051630.1, OR051629.1 | HÁ =1,695  NA = 1,410 | ~1×106 copies/µL | ssRNA (- sense) | -90 oC to -70oC |

*Table S5.* Quantification curve results for the H5 Hemagglutinin (HA) and Pan-FluA matrix (M) RT-qPCR assay, including slope, amplification efficiency, and coefficient of determination (R2) values derived from serial dilutions prepared of the cDNA reference material.

| **Target Gene** | **Slope** | **Efficiency (%)** | **R2 Value** |
| --- | --- | --- | --- |
| H5 (HA) | -3.46 | 95% | 0.999 |
| Pan-FluA (M) | -3.60 | 90% | 0.998 |


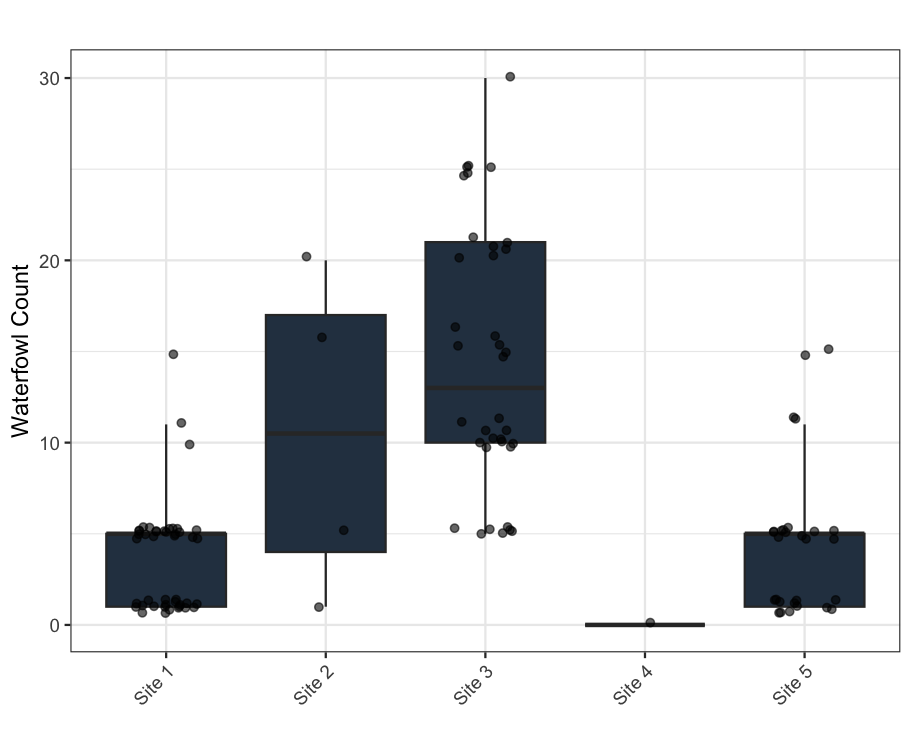


*Figure S1.* Weekly waterfowl counts at Sites 1 through 5 for each sampling event where at least one waterfowl was present. Points represent individual sampling event counts, and boxplots indicate the median and interquartile range of counts observed.


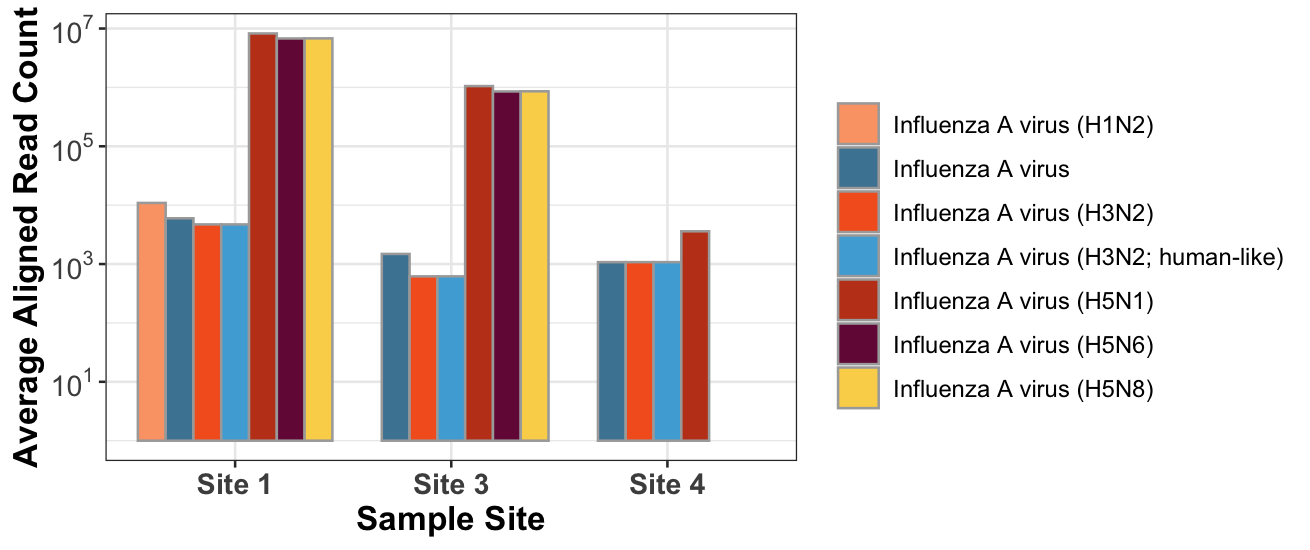


*Figure S2.* Average read counts aligned to Influenza A virus reference genomes across all samples analyzed at Sites 1, 3 and 4. Targeted enrichment sequencing was performed using the Illumina viral surveillance protocol version 2.


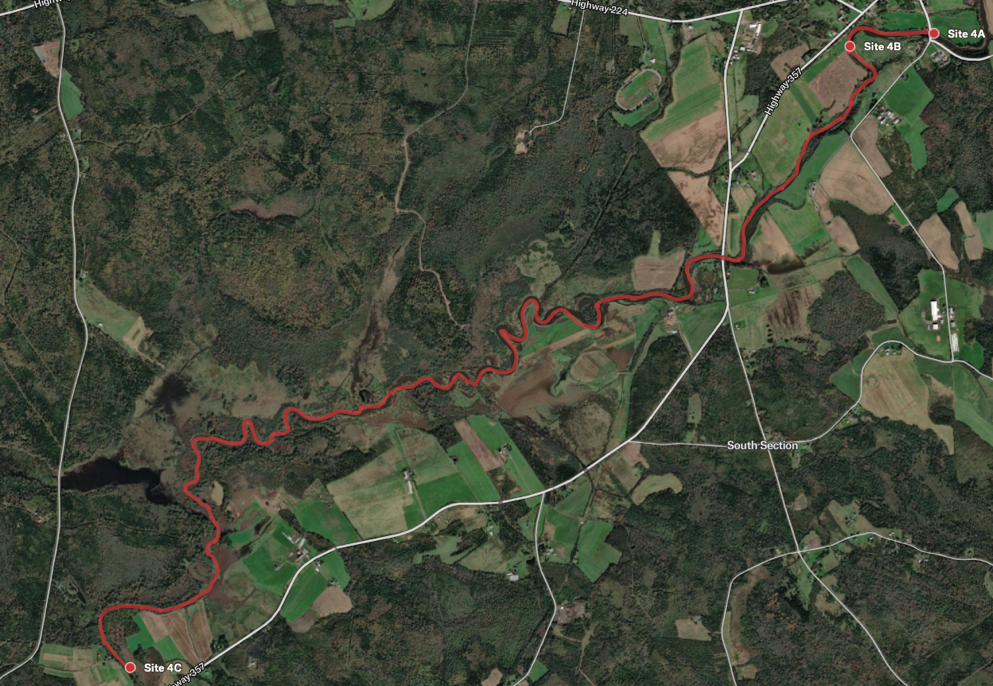


Figure S4. Map of the Site 4 study area showing the approximate locations of Sites 4A, 4B, and 4C. Land use and site functions are described. Site 4A is located at the intake of the municipal drinking water treatment facility and is a direct point for source water quality monitoring. Site 4B is situated downstream of Site 4A (~1 km) at the discharge point of the municipal wastewater treatment facility and captures treated wastewater effluent as it enters the receiving surface water. Site 4C is positioned downstream of Site 4B (~11 km) and is used for recreational purposes.


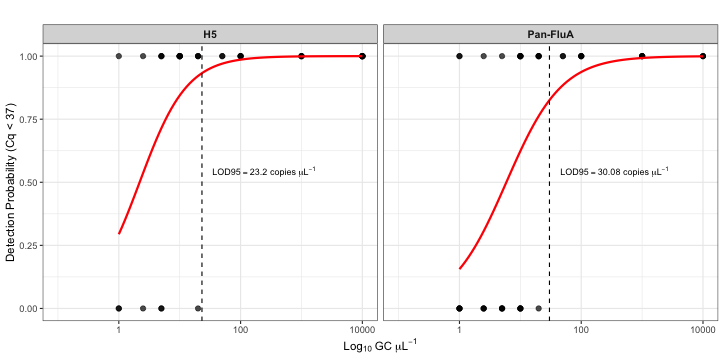


*Figure S4*. Limit of detection at 95% confidence intervals for the duplex RT-qPCR assay. The LOD95% for the H5 and the Pan-FluA targets were estimated by logistic regression modeling and were determined to be ~23 and ~30 copies mL-1, respectively.

*Table S6*. The Environmental Microbiology Minimum Information (EMMI) Guidelines: qPCR and dPCR Quality and Reporting for Environmental Microbiology. Table outline taken from a template provided by Borchardt et al. (2021).


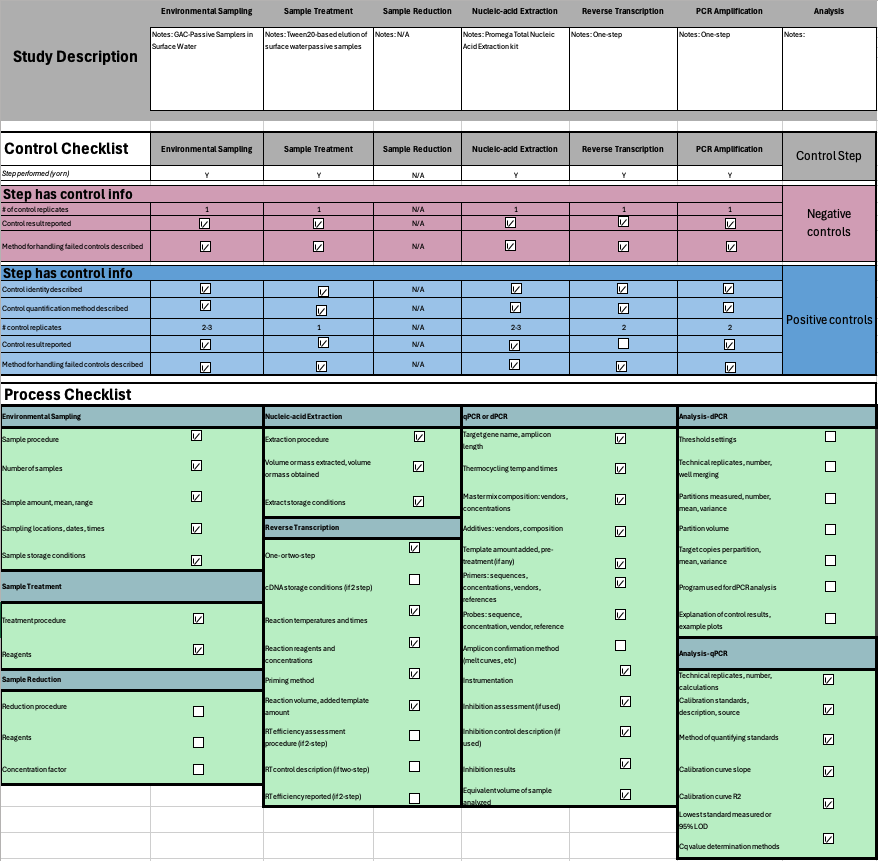

Supplement: Supplementary file 1 [file cfa3886e664c782ec8d160a7.docx]
